# Supplementary material for: Phosphatidylinositol-4-Phosphate 5-Kinases and Phosphatidylinositol 4,5-Bisphosphate Synthesis in the Brain
Source: PubMed Central journal article supplement — J Biol Chem. 2010 Jul 9;285(37):28708–14. doi: 10.1074/jbc.M110.132191 (PMC2937898; doi:10.1074/jbc.m110.132191), 2010-07-09
Supplement: supp_M110.132191_jbc.M110.132191-1.pdf [file supp_M110.132191_jbc.M110.132191-1.pdf]

## SUPPLEMENTARY FIGURE LEGENDS

**Supplementary Figure 1. Quantal secretion at synapses from cultured hippocampal neurons of wild type and single or double  $\beta$  and  $\gamma$  PIPKI KO mice.** The size of the ready releasable pool from hippocampal cultures was determined by application of a hypertonic 0.5M sucrose solution in the presence of tetrodotoxin. All data represents an average from 3 independent experiments (+/- SEM).

**Supplementary Figure 2. PIP2 levels in liver of PIPKI KO mice.** All PIP2 values were normalized to glycerophosphorylserine. Data is expressed as a percent of levels in WT and represent the mean (+/- SEM). \*\* indicates  $p < 0.01$ . N = 8 for wild type, N = 6 for  $\gamma$  KO; N= 3 for  $\alpha$  KO; N= 6 for  $\beta$  KO; N=3 for  $\alpha/\beta$  double KO; N = 6 for  $\beta/\gamma$  double KO.

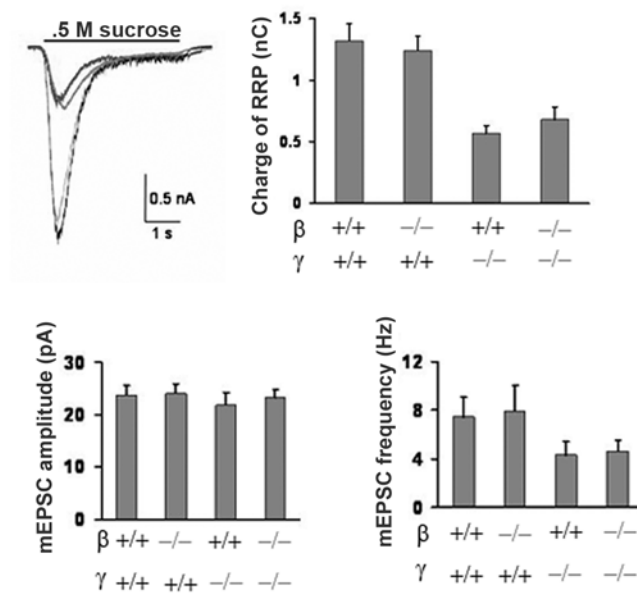

Supplementary Figure 1

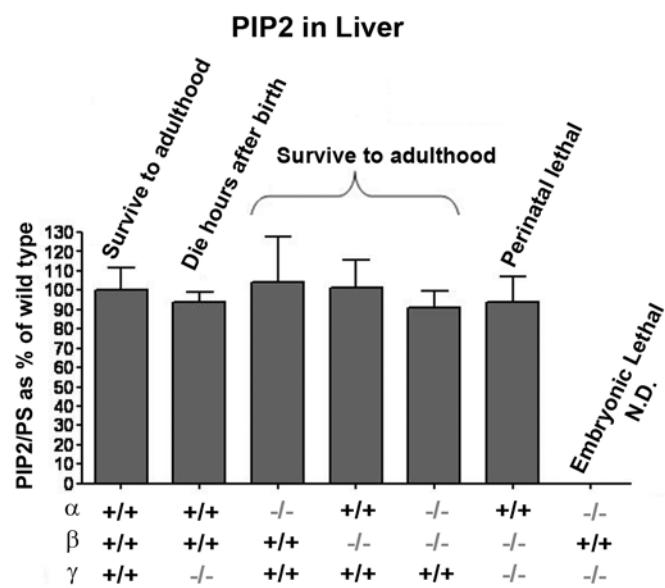

Supplementary Figure 2
